# Supplementary material for: The role of free fatty acid receptor-1 in gastric contractions in Suncus murinus
Source: Royal Society of Chemistry journal article supplement (doi:10.1039/d3fo03565d), 2024-01-01
Supplement: d3fo03565d3.pdf [file d3fo03565d3.pdf]

## **The roles of free fatty acid receptor-1 on gastric contractions in *Suncus murinus***

Jin Huang<sup>1</sup>, Miu Suzuki<sup>1</sup>, Ami Endo<sup>1</sup>, Ayumi Watanabe<sup>1</sup>, Ichiro Sakata<sup>1,2</sup>✉

1. Area of Regulatory Biology, Division of Life Science, Graduate School of Science and Engineering, Saitama University, Saitama, Japan
2. Research Area of Evolutionary Molecular Design, Strategic Research Center, Saitama University, Saitama, Japan

✉Correspondence: Ichiro Sakata, Area of Regulatory Biology, Division of Life Science, Graduate School of Science and Engineering, Saitama University, 255 Shimo-okubo, Sakuraku, Saitama 338-8570, Japan. ORCID: <https://orcid.org/0000-0002-6067-0407>. Email: [isakata@mail.saitama-u.ac.jp](mailto:isakata@mail.saitama-u.ac.jp).

### **Supplementary figure legend**

#### **Fig. S1 Effects of DHA administration on gastric contractions during the interdigestive state**

(A) Typical traces show that vehicle (saline) induced gastric contractions during the phase I contractions of MMC. (B) DHA administration (IG) at a dose of 20 mg/kg induced gastric contractions during the phase I contractions of MMC. (C) Motility index (MI) of gastric contractions induced by vehicle or DHA injections to the end of phase III contractions (paired t-tests,  $P=0.311$ .  $n=3$ ). (D) Duration from

the vehicle or DHA intervention to peak phase III contractions (paired t-tests,  $P=0.038$ .  $n=3$ ). \*, PPGC or phase III contractions. Data are mean  $\pm$  SD. †,  $P < 0.05$ , compared with vehicle group.

**Fig. S2 Effects of OA administration on gastric contractions at the latter half phase of PPC**

(A) Typical traces show that vehicle (saline) administered at 70min after feeding induced gastric contractions. (B) Contractions induced by feeding with OA administration (IG, 160 mg/kg) at 70min after feeding. (C) Motility index (MI) of gastric contractions from vehicle or OA injections to end of PPGC (paired t-tests,  $P=0.029$ .  $n=4$ ). (D) Duration from feeding to end of PPGC with vehicle or OA administration (paired t-tests,  $P=0.022$ .  $n=6$ ). \*, PPGC or phase III contractions. Data are mean  $\pm$  SD. †,  $P < 0.05$ , compared with vehicle group.
