# Supplementary figures and images for: The role of free fatty acid receptor-1 in gastric contractions in Suncus murinus
Source: Royal Society of Chemistry journal article supplement (doi:10.1039/d3fo03565d), 2024-01-01

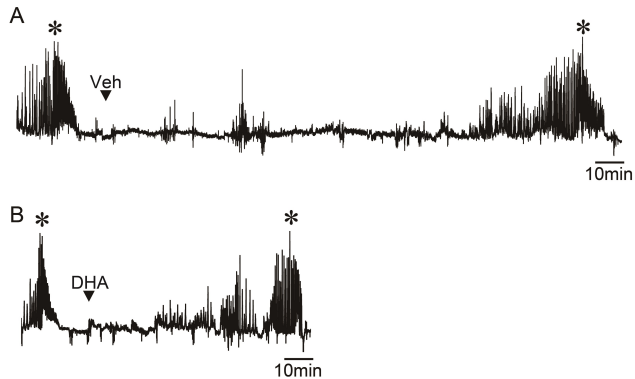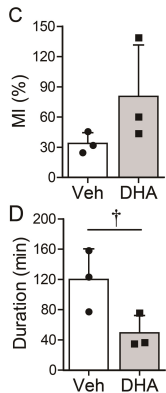

Supplement: d3fo03565d1.pdf [file d3fo03565d1.pdf]

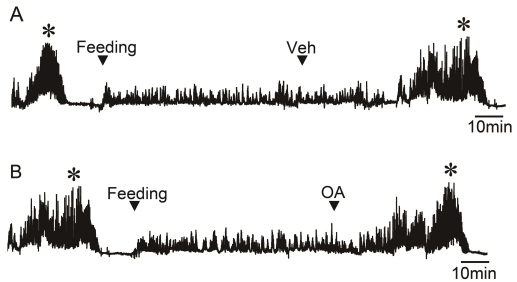

*Fig. S2*

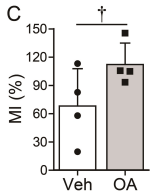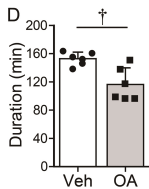

Supplement: d3fo03565d2.pdf [file d3fo03565d2.pdf]
